# Supplementary material
Source: publisher site journal article supplement (https://www.spandidos-publications.com/7537/downloadSupplementary)

Figure S1. Correlation between membranous SDC1 scores and serum SDC1 levels before outliers were excluded using the Smirnov-Grubbs test. Membranous SDC1 score and (A) preoperative and (B) postoperative SDC1 levels. (C) Membranous SDC1 score and changes in serum SDC1 level from preoperative to postoperative. Correlations were assessed using Spearman's rank correlation coefficient. SDC1, syndecan-1.

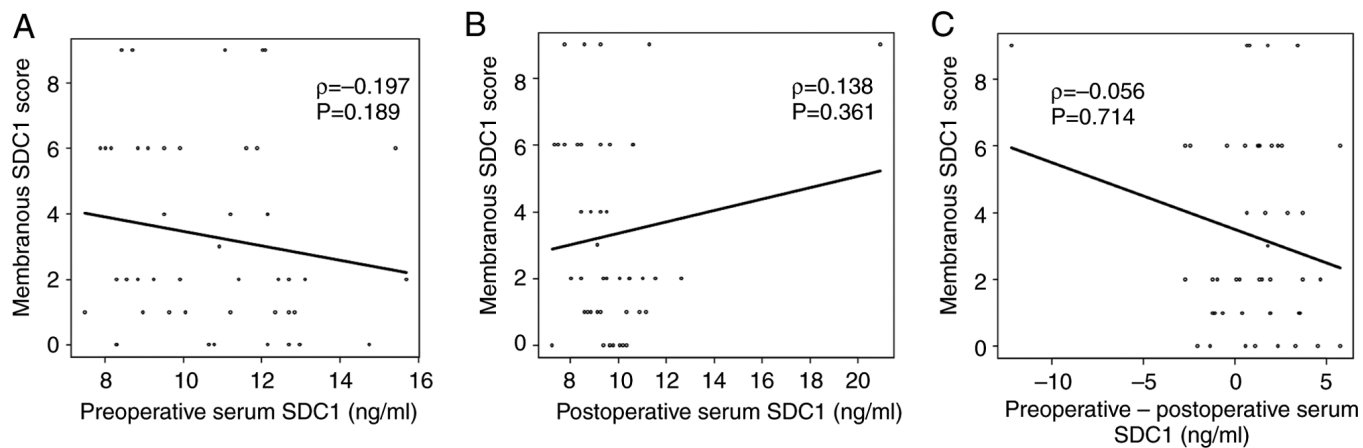

Supplement: Supplementary file 1 [file downloadSupplementary]
